# Supplementary material for: Characterization of the GATC regulatory network in E. coli
Source: PubMed Central journal article supplement (PMC493266; doi:10.1186/1471-2164-5-48), 2004-07-20
Supplement: 1471-2164-5-48-S1.pdf [file 1471-2164-5-48-S1.pdf]

| ORF(#ID)         | cds name of <i>E. coli</i> or <i>Salmonella</i> | SPT <sub>r</sub> _ID for <i>E. coli</i> | SPT <sub>r</sub> _ID for <i>Salmonella</i> | "EcoCyc genes" <i>E. coli</i> | "Mitomycin C genes" <i>E. coli</i> | "GATC genes" <i>E. coli</i> | "GATC genes" <i>Salmonella</i> | "Oshima genes" <i>E. coli</i> | EcoCyc functional class                                | EcoCyc functional class (modified)                     | Subclass (where applicable) | justification for change of functional class (where applicable)  |
|------------------|-------------------------------------------------|-----------------------------------------|--------------------------------------------|-------------------------------|------------------------------------|-----------------------------|--------------------------------|-------------------------------|--------------------------------------------------------|--------------------------------------------------------|-----------------------------|------------------------------------------------------------------|
| JW2326 (409#1)   | <i>aroC</i>                                     | AROC_ECOLI                              |                                            | 0                             | 0                                  | 1                           | 0                              | 0                             | Amino acid metabolism                                  | Amino acid metabolism                                  |                             |                                                                  |
| JW1734 (327#8)   | <i>astB</i>                                     |                                         | Q8Z6G2                                     | 0                             | 0                                  | 0                           | 1                              | 1                             | Amino acid metabolism                                  | Amino acid metabolism                                  |                             |                                                                  |
| JW3911 (537#1)   | <i>metL</i>                                     | AK2H_ECOLI                              |                                            | 0                             | 0                                  | 1                           | 0                              | 0                             | Amino acid metabolism                                  | Amino acid metabolism                                  |                             |                                                                  |
| JW0436 (150#3)   | <i>cof</i>                                      | COF_ECOLI                               | Q8Z8U7                                     | 0                             | 0                                  | 1                           | 1                              | 0                             | Hypothetical                                           | Biosynthesis of cofactors, prosthetic groups, carriers |                             | The relevant SWALL entry gives: "Possible role in ferric uptake" |
| JW0586 (165#9)   | <i>entE</i>                                     | ENTE_ECOLI                              | Q8Z8L1                                     | 0                             | 0                                  | 1                           | 1                              | 1                             | Biosynthesis of cofactors, prosthetic groups, carriers | Biosynthesis of cofactors, prosthetic groups, carriers |                             |                                                                  |
| JW0372 (142#7)   | <i>ddlA</i>                                     | DDLA_ECOLI                              | DDLA_SALTY                                 | 0                             | 0                                  | 1                           | 1                              | 0                             | Cell envelope                                          | Cell envelope                                          |                             |                                                                  |
| JW4192 (657#19)  | <i>mpl</i>                                      |                                         | Q8Z145                                     | 0                             | 0                                  | 0                           | 1                              | 0                             | Cell envelope                                          | Cell envelope                                          |                             |                                                                  |
| JW2503 (429#3.1) | <i>pbpC</i>                                     | PBPC_ECOLI                              |                                            | 0                             | 0                                  | 1                           | 0                              | 0                             | Cell envelope                                          | Cell envelope                                          |                             |                                                                  |
| JW3914 (537#3)   | <i>katG</i>                                     | CATA_ECOLI                              |                                            | 0                             | 1                                  | 1                           | 0                              | 0                             | Cellular process                                       | Cellular process                                       |                             |                                                                  |
| JW1878 (339#5)   | <i>motB</i>                                     |                                         | Q8Z5U7                                     | 0                             | 0                                  | 0                           | 1                              | 1                             | Cellular process                                       | Cellular process                                       |                             |                                                                  |
| JW4200 (658#1)   | <i>treR</i>                                     |                                         | Q8Z133                                     | 1                             | 0                                  | 0                           | 1                              | 0                             | Cellular process                                       | Cellular process                                       |                             |                                                                  |
| JW0181 (123#1)   | <i>ldcC</i>                                     | DCLZ_ECOLI                              | Q8Z998                                     | 0                             | 0                                  | 1                           | 1                              | 0                             | Central intermediary metabolism                        | Central intermediary metabolism                        |                             |                                                                  |
| JW3195 (526#1)   | <i>nanR</i>                                     | NANR_ECOLI                              |                                            | 0                             | 0                                  | 1                           | 0                              | 0                             | Central intermediary metabolism                        | Central intermediary metabolism                        |                             |                                                                  |
| JW4053 (643#4)   | <i>phnP</i>                                     | PHNP_ECOLI                              |                                            | 0                             | 0                                  | 1                           | 0                              | 0                             | Central intermediary metabolism                        | Central intermediary metabolism                        |                             |                                                                  |
| JW4185 (657#12)  | <i>ppa</i>                                      | IPYR_ECOLI                              |                                            | 0                             | 0                                  | 1                           | 0                              | 0                             | Central intermediary metabolism                        | Central intermediary metabolism                        |                             |                                                                  |

|                    |                                |            |            |   |   |   |   |      |                                 |                   |             |                                                                                                                                                                                                                                      |
|--------------------|--------------------------------|------------|------------|---|---|---|---|------|---------------------------------|-------------------|-------------|--------------------------------------------------------------------------------------------------------------------------------------------------------------------------------------------------------------------------------------|
| JW2721<br>(452#7)  | <i>cysN</i>                    |            | CYSN_SALTI | 0 | 0 | 0 | 1 | 0    | Central intermediary metabolism | Energy metabolism | Respiration | The enzyme is implicated in the cysteine biosynthetic pathway. However, its counterpart in <i>E. coli</i> , CysN, is also required for the formation of selenocysteine tRNA (KEGG) and thus required for the formate dehydrogenases. |
| JW0877<br>(215#7)  | <i>dmsA</i>                    | DMSA_ECOLI | Q8Z812     | 0 | 0 | 1 | 1 | 1    | Energy metabolism               | Energy metabolism | Respiration |                                                                                                                                                                                                                                      |
| JW2235<br>(378#7)  | <i>glpA</i>                    | GLPA_ECOLI |            | 0 | 0 | 1 | 0 | 0    | Energy metabolism               | Energy metabolism | Respiration |                                                                                                                                                                                                                                      |
| JW2395<br>(417#3)  | <i>gltX</i>                    | SYE_ECOLI  | SYE_SALTI  | 0 | 0 | 1 | 1 | 0    | Translation                     | Energy metabolism | Respiration | GltX is required for ALA (aminolevulinic acid) synthesis, which is fundamental for heme synthesis and thus important for a number of respiratory components.                                                                         |
| JW2476<br>(425#4)  | <i>hyfR</i>                    | HYFR_ECOLI |            | 0 | 0 | 1 | 0 | 0    | Translation                     | Energy metabolism | Respiration | [15]                                                                                                                                                                                                                                 |
| JW3580<br>(575#3)  | <i>lldD</i>                    | LLDD_ECOLI |            | 0 | 0 | 1 | 0 | 1    | Energy metabolism               | Energy metabolism | Respiration |                                                                                                                                                                                                                                      |
| JW1212<br>(248#11) | <i>narL</i>                    | NARL_ECOLI |            | 0 | 0 | 1 | 0 | 0    | Energy metabolism               | Energy metabolism | Respiration |                                                                                                                                                                                                                                      |
| JW2181<br>(372#1)  | <i>narP</i>                    |            | Q8Z576     | 0 | 0 | 0 | 1 | 0    | Energy metabolism               | Energy metabolism | Respiration |                                                                                                                                                                                                                                      |
| JW3328<br>(624#7)  | <i>nirB</i>                    | NIRB_ECOLI | Q8Z1Z9     | 0 | 0 | 1 | 1 | 1    | Energy metabolism               | Energy metabolism | Respiration |                                                                                                                                                                                                                                      |
| JW3563<br>(577#4)  | <i>selB</i>                    | SELB_ECOLI | Q8Z2D7     | 0 | 0 | 1 | 1 | 0    | Translation                     | Energy metabolism | Respiration | SWALL: "Translation factor necessary for the incorporation of selenocysteine into proteins". These proteins are the formate dehydrogenases (involved in respiration).                                                                |
| JW3934<br>(535#8)  | <i>sthA</i><br>( <i>udhA</i> ) | STHA_ECOLI | STHA_SALTY | 0 | 0 | 1 | 1 | 1    | Energy metabolism               | Energy metabolism | Respiration |                                                                                                                                                                                                                                      |
| JW3975<br>(631#1)  | <i>aceA; icl</i>               |            | Q8Z1V9     | 0 | 0 | 0 | 1 | 1    | Central intermediary metabolism | Energy metabolism | Succinate   | Part of the TCA cycle and therefore placed in this group (like sucD).                                                                                                                                                                |
| JW0718<br>(177#3)  | <i>sucD</i>                    | SUCD_ECOLI | Q8Z8C5     | 0 | 1 | 1 | 1 | 1    | Energy metabolism               | Energy metabolism | Succinate   |                                                                                                                                                                                                                                      |
| JW2887<br>(471#10) | <i>ygfH</i>                    | YGFH_ECOLI |            | 0 | 0 | 1 | 0 | 0    | Hypothetical                    | Energy metabolism | Succinate   | [31]                                                                                                                                                                                                                                 |
| JW1228<br>(251#7)  | <i>adhE</i>                    | ADHE_ECOLI |            | 0 | 1 | 1 | 0 | 1    | Energy metabolism               | Energy metabolism |             |                                                                                                                                                                                                                                      |
| JW2894<br>(473#1)  | <i>epd; gapB</i>               |            | Q8XGA4     | 0 | 0 | 0 | 1 | 0    | Energy metabolism               | Energy metabolism |             |                                                                                                                                                                                                                                      |
| JW0740<br>(179#8)  | <i>galK</i>                    | GAL1_ECOLI |            | 1 | 0 | 1 | 0 | 0    | Energy metabolism               | Energy metabolism |             |                                                                                                                                                                                                                                      |
| JW3391<br>(616#2)  | <i>glgP</i>                    | PHSG_ECOLI |            | 0 | 0 | 1 | 0 | 0    | Energy metabolism               | Energy metabolism |             |                                                                                                                                                                                                                                      |
|                    | <i>maeB</i>                    | MAO2_ECOLI |            | 0 | 0 | 1 | 0 | N.A. | N.A.                            | Energy metabolism |             |                                                                                                                                                                                                                                      |

|                 |                |            |            |  |   |   |   |   |   |   |                                    |                                    |                   |                                                                                                                                                                         |
|-----------------|----------------|------------|------------|--|---|---|---|---|---|---|------------------------------------|------------------------------------|-------------------|-------------------------------------------------------------------------------------------------------------------------------------------------------------------------|
| JW3062 (512#10) | <i>uxaA</i>    | UXAA_ECOLI |            |  | 0 | 0 | 1 | 0 | 0 | 0 | Energy metabolism                  | Energy metabolism                  |                   |                                                                                                                                                                         |
| JW2547 (434#6)  | <i>acpS</i>    | ACPS_ECOLI |            |  | 0 | 0 | 1 | 0 | 0 | 0 | Fatty acid/Phospholipid metabolism | Fatty acid/Phospholipid metabolism | Coenzyme/cofactor |                                                                                                                                                                         |
| JW3744 (556#5)  | <i>ilvD</i>    | ILVD_ECOLI |            |  | 0 | 0 | 1 | 0 | 0 | 0 | Amino acid metabolism              | Fatty acid/Phospholipid metabolism | Coenzyme/cofactor | The enzyme has two functions: the first in the amino acid metabolism (valine and isoleucine), the second in the biosynthesis of ACP. We emphasize this second function. |
| JW3720 (560#16) | <i>mioC</i>    | MIOC_ECOLI |            |  | 0 | 1 | 1 | 0 | 0 | 0 | Replication                        | Fatty acid/Phospholipid metabolism | Coenzyme/cofactor | [27]                                                                                                                                                                    |
| JW2704 (450#5)  | <i>prpB</i>    | PRPB_ECOLI |            |  | 1 | 0 | 1 | 0 | 0 | 0 | Hypothetical                       | Fatty acid/Phospholipid metabolism | Propionate        | part of the same catabolic pathway as prpE.                                                                                                                             |
| JW0326 (138#1)  | <i>prpE</i>    | PRPE_ECOLI | Q8Z902     |  | 0 | 0 | 1 | 1 | 0 | 0 | Fatty acid/Phospholipid metabolism | Fatty acid/Phospholipid metabolism | Propionate        |                                                                                                                                                                         |
| JW0322 (137#7)  | <i>prpR</i>    |            | Q8Z906     |  | 0 | 0 | 0 | 1 | 0 | 0 | Regulatory functions               | Fatty acid/Phospholipid metabolism | Propionate        | the transcriptional regulator of the prp operon, hence the placement.                                                                                                   |
| JW2433 (421#5)  | <i>eutC</i>    | EUTC_ECOLI |            |  | 0 | 0 | 1 | 0 | 0 | 0 | Fatty acid/Phospholipid metabolism | Fatty acid/Phospholipid metabolism |                   |                                                                                                                                                                         |
| JW0408 (146#11) | <i>pgpA</i>    | PGPA_ECOLI |            |  | 0 | 0 | 1 | 0 | 0 | 0 | Fatty acid/Phospholipid metabolism | Fatty acid/Phospholipid metabolism |                   |                                                                                                                                                                         |
| JW0482 (155#2)  | <i>ybbO</i>    | YBBO_ECOLI | Q8XGS4     |  | 0 | 0 | 1 | 1 | 1 | 1 | Fatty acid/Phospholipid metabolism | Fatty acid/Phospholipid metabolism |                   |                                                                                                                                                                         |
| JW0080 (109#10) | <i>mraW</i>    |            | MRAW_SALT1 |  | 0 | 0 | 0 | 1 | 0 | 0 | Hypothetical                       | Hypothetical                       |                   |                                                                                                                                                                         |
| JW2635 (443#4)  | <i>STY2910</i> |            | Q8Z4F9     |  | 0 | 0 | 0 | 1 | 1 | 1 | Hypothetical                       | Hypothetical                       |                   |                                                                                                                                                                         |
| JW3819 (550#14) | <i>STY3047</i> |            | Q8Z475     |  | 0 | 0 | 0 | 1 | 0 | 0 | Hypothetical                       | Hypothetical                       |                   |                                                                                                                                                                         |
| JW2731 (453#3)  | <i>STY3071</i> |            | Q8Z461     |  | 0 | 0 | 0 | 1 | 0 | 0 | Hypothetical                       | Hypothetical                       |                   |                                                                                                                                                                         |
| JW2983 (505#13) | <i>STY3342</i> |            | Q8Z3P9     |  | 0 | 0 | 0 | 1 | 0 | 0 | Hypothetical                       | Hypothetical                       |                   |                                                                                                                                                                         |
| JW3453 (609#1)  | <i>STY4224</i> |            | Q8Z260     |  | 0 | 0 | 0 | 1 | 0 | 0 | Hypothetical                       | Hypothetical                       |                   |                                                                                                                                                                         |

|                     |                     |            |            |      |      |   |   |      |                       |                       |                      |  |                                                                                                                                                        |
|---------------------|---------------------|------------|------------|------|------|---|---|------|-----------------------|-----------------------|----------------------|--|--------------------------------------------------------------------------------------------------------------------------------------------------------|
|                     | <i>ybgG</i>         | YBGG_ECOLI |            | 0    | 0    | 1 | 0 | N.A. | N.A.                  | Hypothetical          |                      |  |                                                                                                                                                        |
| JW2166<br>(370#7)   | <i>yejB</i>         | YEJB_ECOLI |            | 0    | 0    | 1 | 0 | 0    | Hypothetical          | Hypothetical          |                      |  |                                                                                                                                                        |
| JW2227<br>(377#1)   | <i>yfaL</i>         | YFAL_ECOLI |            | 0    | 0    | 1 | 0 | 0    | Hypothetical          | Hypothetical          |                      |  |                                                                                                                                                        |
|                     | <i>yfhM</i>         | YFHM_ECOLI |            | 0    | 0    | 1 | 0 | N.A. | N.A.                  | Hypothetical          |                      |  |                                                                                                                                                        |
|                     | <i>yghJ</i>         | ACFD_ECOLI |            | 0    | 0    | 1 | 0 | N.A. | N.A.                  | Hypothetical          |                      |  |                                                                                                                                                        |
| JW3006<br>(507#9)   | <i>ygiC</i>         |            | Q8XFP6     | 0    | 0    | 0 | 1 | 0    | Hypothetical          | Hypothetical          |                      |  |                                                                                                                                                        |
| JW3853<br>(544#5)   | <i>yihU</i>         | YIHU_ECOLI | Q8Z2T6     | 0    | 0    | 1 | 1 | 0    | Hypothetical          | Hypothetical          |                      |  |                                                                                                                                                        |
| JW3989<br>(633#9)   | <i>yjbH</i>         | YJBH_ECOLI | Q8Z1U4     | 0    | 0    | 1 | 1 | 0    | Hypothetical          | Hypothetical          |                      |  |                                                                                                                                                        |
| JW4190<br>(657#17)  | <i>yjff</i>         | YJFF_ECOLI |            | 0    | 0    | 1 | 0 | 0    | Hypothetical          | Hypothetical          |                      |  |                                                                                                                                                        |
| JW4138<br>(654#1)   | <i>yjfh</i>         | YJFH_ECOLI | Q8Z182     | 0    | 0    | 1 | 1 | 0    | Hypothetical          | Hypothetical          |                      |  |                                                                                                                                                        |
| JW4299<br>(668#8)   | <i>yjin</i>         | YJIN_ECOLI |            | 0    | 0    | 1 | 0 | 0    | Hypothetical          | Hypothetical          |                      |  |                                                                                                                                                        |
| JW0658<br>(171#5.1) | <i>yleA</i>         | YLEA_ECOLI |            | 0    | 0    | 1 | 0 | 0    | Hypothetical          | Hypothetical          |                      |  |                                                                                                                                                        |
|                     | <i>mod</i>          |            | Q8Z913     | N.A. | N.A. | 0 | 1 | N.A. | N.A.                  | Hypothetical          |                      |  |                                                                                                                                                        |
|                     | <i>STY0042</i>      |            | Q8Z9N9     | N.A. | N.A. | 0 | 1 | N.A. | N.A.                  | Hypothetical          |                      |  |                                                                                                                                                        |
|                     | <i>STY0099</i>      |            | Q8Z9K2     | N.A. | N.A. | 0 | 1 | N.A. | N.A.                  | Hypothetical          |                      |  |                                                                                                                                                        |
|                     | <i>STY0319</i>      |            | Q8Z954     | N.A. | N.A. | 0 | 1 | N.A. | N.A.                  | Hypothetical          |                      |  |                                                                                                                                                        |
|                     | <i>STY3047</i>      |            | Q8Z475     | N.A. | N.A. | 0 | 1 | N.A. | N.A.                  | Hypothetical          |                      |  |                                                                                                                                                        |
|                     | <i>STY3536</i>      |            | Q8Z3E3     | N.A. | N.A. | 0 | 1 | N.A. | N.A.                  | Hypothetical          |                      |  |                                                                                                                                                        |
|                     | <i>STY4415</i>      |            | Q8Z1U9     | N.A. | N.A. | 0 | 1 | N.A. | N.A.                  | Hypothetical          |                      |  |                                                                                                                                                        |
|                     | <i>STY4459</i>      |            | Q8Z1S1     | N.A. | N.A. | 0 | 1 | N.A. | N.A.                  | Hypothetical          |                      |  |                                                                                                                                                        |
| JW3962<br>(532#1)   | <i>nfi</i>          | NFI_ECOLI  |            | 0    | 0    | 1 | 0 | 0    | Transcription         | Nucleotide metabolism | DNA repair           |  | SWALL: "Selectively cleaves single-stranded DNA or duplex DNA containing uracil or that is damaged by a variety of agents....could act in DNA repair". |
| JW2788<br>(460#1)   | <i>recB</i>         | EX5B_ECOLI |            | 0    | 0    | 1 | 0 | 0    | Nucleotide metabolism | Nucleotide metabolism | DNA repair           |  |                                                                                                                                                        |
| JW2787<br>(459#9)   | <i>recD</i>         | EX5A_ECOLI |            | 0    | 0    | 1 | 0 | 0    | Nucleotide metabolism | Nucleotide metabolism | DNA repair           |  |                                                                                                                                                        |
| JW4019<br>(637#7)   | <i>uvrA</i>         | UVRA_ECOLI |            | 1    | 1    | 1 | 0 | 1    | Replication           | Nucleotide metabolism | DNA repair           |  | SWALL: "the ABC excision nuclease is a DNA repair enzyme that catalyzes the excision reaction of UV-damaged nucleotide segments".                      |
| JW2008<br>(351#4)   | <i>hisI (hisIE)</i> | HIS2_ECOLI | HIS2_SALTI | 0    | 0    | 1 | 1 | 0    | Amino acid metabolism | Nucleotide metabolism | Nucleotide synthesis |  | Involved in two steps of the histidine biosynthetic pathway which are in common with the purine biosynthetic pathway.                                  |
| JW3969<br>(532#8)   | <i>purD</i>         |            | Q8Z334     | 0    | 0    | 0 | 1 | 1    | Nucleotide metabolism | Nucleotide metabolism | Nucleotide synthesis |  |                                                                                                                                                        |
| JW2309<br>(406#15)  | <i>purF</i>         | PUR1_ECOLI | Q8Z503     | 0    | 0    | 1 | 1 | 1    | Nucleotide metabolism | Nucleotide metabolism | Nucleotide synthesis |  |                                                                                                                                                        |

|                    |                        |            |            |   |   |   |   |      |                           |                           |                      |                                                                                 |
|--------------------|------------------------|------------|------------|---|---|---|---|------|---------------------------|---------------------------|----------------------|---------------------------------------------------------------------------------|
| JW0928<br>(221#13) | <i>pyrD</i>            | PYRD_ECOLI |            | 0 | 0 | 1 | 0 | 0    | Nucleotide metabolism     | Nucleotide metabolism     | Nucleotide synthesis |                                                                                 |
| JW4203<br>(658#4)  | <i>pyrI</i>            | PYRI_ECOLI |            | 0 | 0 | 1 | 0 | 0    | Nucleotide metabolism     | Nucleotide metabolism     | Nucleotide synthesis |                                                                                 |
| JW4313<br>(670#8)  | <i>hsdR; hsr</i>       | T1RK_ECOLI | Q8Z0W6     | 0 | 1 | 1 | 1 | 0    | Nucleotide metabolism     | Nucleotide metabolism     |                      |                                                                                 |
| JW2553<br>(435#3)  | <i>lepA</i>            | LEPA_ECOLI | LEPA_SALTY | 0 | 0 | 1 | 1 | 0    | Nucleotide metabolism     | Nucleotide metabolism     |                      |                                                                                 |
| JW1793<br>(333#10) | <i>rmd</i>             | RND_ECOLI  |            | 0 | 0 | 1 | 0 | 0    | Nucleotide metabolism     | Nucleotide metabolism     |                      |                                                                                 |
| JW0557<br>(162#3)  | <i>nfrA</i>            | NFRA_ECOLI |            | 0 | 0 | 1 | 0 | 0    | Hypothetical              | Other categories          |                      | as it has been assigned a SPTrembl ID, "Other categories" seems more justified. |
| JW2507<br>(429#8)  | <i>pepB</i>            | PEPB_ECOLI |            | 0 | 0 | 1 | 0 | 0    | Other categories          | Other categories          |                      |                                                                                 |
|                    | <i>psiE</i>            | PSIE_ECOLI |            | 0 | 0 | 1 | 0 | N.A. | N.A.                      | Other categories          |                      |                                                                                 |
| JW3000<br>(507#3)  | <i>STY3361</i>         |            | Q8Z3P0     | 0 | 0 | 0 | 1 | 0    | Other categories          | Other categories          |                      |                                                                                 |
| JW2064<br>(358#2)  | <i>baeR</i>            | BAER_ECOLI |            | 0 | 0 | 1 | 0 | 0    | Regulatory functions      | Regulatory functions      |                      |                                                                                 |
| JW2212<br>(374#3)  | <i>rscC</i>            |            | RCSC_SALTI | 0 | 0 | 0 | 1 | 0    | Regulatory functions      | Regulatory functions      |                      |                                                                                 |
| JW3212<br>(528#1)  | <i>yhcS</i>            |            | Q8XFH1     | 0 | 0 | 0 | 1 | 0    | Regulatory functions      | Regulatory functions      |                      |                                                                                 |
| JW3679<br>(565#10) | <i>dnaA</i>            | DNAA_ECOLI | DNAA_SALTI | 0 | 0 | 1 | 1 | 0    | Replication               | Replication               |                      |                                                                                 |
| JW4325<br>(672#5)  | <i>dnaC</i>            | DNAC_ECOLI | Q8Z0W1     | 0 | 0 | 1 | 1 | 0    | Replication               | Replication               |                      |                                                                                 |
| JW0905<br>(218#8)  | <i>mukF</i>            | MUKF_ECOLI |            | 0 | 0 | 1 | 0 | 0    | Cellular process          | Replication               |                      | [32,33]                                                                         |
| JW2998<br>(507#1)  | <i>parE<br/>(nfxD)</i> | PARE_ECOLI | PARE_SALTY | 0 | 0 | 1 | 1 | 0    | Replication               | Replication               |                      |                                                                                 |
| JW2481<br>(426#5)  | <i>yfgE</i>            |            | Q8XEQ0     | 0 | 0 | 0 | 1 | 0    | Replication               | Replication               |                      |                                                                                 |
| JW0058<br>(106#11) | <i>hepA</i>            | HEPA_ECOLI |            | 0 | 0 | 1 | 0 | 0    | Transcription             | Transcription             |                      |                                                                                 |
| JW3133<br>(519#2)  | <i>pnp</i>             |            | Q8Z3I0     | 0 | 0 | 0 | 1 | 0    | Transcription             | Transcription             |                      |                                                                                 |
| JW0836<br>(210#10) | <i>rimK</i>            |            | RIMK_SALTY | 0 | 1 | 0 | 1 | 0    | Translation               | Translation               |                      |                                                                                 |
| JW0396<br>(145#4)  | <i>tgt</i>             |            | TGT_SALTI  | 0 | 0 | 0 | 1 | 0    | Translation               | Translation               |                      |                                                                                 |
| JW3106<br>(517#2)  | <i>agaY</i>            | AGAY_ECOLI |            | 0 | 0 | 1 | 0 | 0    | Transport/binding protein | Transport/binding protein |                      |                                                                                 |
| JW4166<br>(655#15) | <i>cycA;<br/>dagA</i>  |            | Q8Z160     | 0 | 0 | 0 | 1 | 0    | Transport/binding protein | Transport/binding protein |                      |                                                                                 |
| JW3512<br>(603#13) | <i>dppB</i>            | DPPB_ECOLI |            | 0 | 0 | 1 | 0 | 1    | Transport/binding protein | Transport/binding protein |                      |                                                                                 |

|                   |             |            |        |   |   |   |   |      |                           |                           |  |  |
|-------------------|-------------|------------|--------|---|---|---|---|------|---------------------------|---------------------------|--|--|
| JW0103<br>(112#3) | <i>hofB</i> | HOFB_ECOLI |        | 0 | 0 | 1 | 0 | 0    | Transport/binding protein | Transport/binding protein |  |  |
| JW1613<br>(315#3) | <i>malX</i> | PTOA_ECOLI |        | 0 | 0 | 1 | 0 | 0    | Transport/binding protein | Transport/binding protein |  |  |
| JW4201<br>(658#2) | <i>mgtA</i> | ATMA_ECOLI |        | 0 | 0 | 1 | 0 | 0    | Transport/binding protein | Transport/binding protein |  |  |
| JW3226<br>(529#7) | <i>panF</i> | PANF_ECOLI | Q8Z3D2 | 0 | 0 | 1 | 1 | 0    | Transport/binding protein | Transport/binding protein |  |  |
| JW4066<br>(644#1) | <i>phnD</i> | PHND_ECOLI |        | 0 | 0 | 1 | 0 | 0    | Transport/binding protein | Transport/binding protein |  |  |
| JW2797<br>(461#7) | <i>ptsP</i> |            | Q8Z411 | 0 | 0 | 0 | 1 | 0    | Transport/binding protein | Transport/binding protein |  |  |
| JW3315<br>(625#6) | <i>yheS</i> | YHES_ECOLI |        | 0 | 0 | 1 | 0 | 0    | Transport/binding protein | Transport/binding protein |  |  |
|                   | <i>ypdD</i> | YPDD_ECOLI |        | 0 | 0 | 1 | 0 | N.A. | N.A.                      | Transport/binding protein |  |  |
|                   | <i>zitB</i> | ZITB_ECOLI |        | 0 | 0 | 1 | 0 | N.A. | N.A.                      | Transport/binding protein |  |  |
