# Supplementary material for: Characterization of the GATC regulatory network in E. coli
Source: PubMed Central journal article supplement (PMC493266; doi:10.1186/1471-2164-5-48), 2004-07-20
Supplement: 1471-2164-5-48-S2.pdf [file 1471-2164-5-48-S2.pdf]

| Functional class                                       | "GATC genes" | all of <i>E. coli</i> 's genes | "EcoCyc genes" | "Mitomycin C genes" | "Oshima genes" |
|--------------------------------------------------------|--------------|--------------------------------|----------------|---------------------|----------------|
| Amino acid metabolism                                  | 2            | 134                            | 0              | 5                   | 14             |
| Biosynthesis of cofactors, prosthetic groups, carriers | 2            | 127                            | 2              | 1                   | 7              |
| Cell envelope                                          | 2            | 194                            | 5              | 10                  | 10             |
| Cellular process                                       | 1            | 102                            | 18             | 14                  | 17             |
| Central intermediary metabolism                        | 4            | 149                            | 9              | 15                  | 20             |
| Energy metabolism                                      | 16           | 363                            | 6              | 29                  | 51             |
| Fatty acid/Phospholipid metabolism                     | 8            | 64                             | 1              | 4                   | 6              |
| Nucleotide metabolism                                  | 11           | 120                            | 2              | 14                  | 20             |
| Other categories                                       | 3            | 236                            | 30             | 15                  | 16             |
| Regulatory functions                                   | 1            | 104                            | 12             | 5                   | 6              |
| Replication                                            | 4            | 89                             | 14             | 19                  | 9              |
| Transcription                                          | 1            | 47                             | 5              | 7                   | 5              |
| Translation                                            | 0            | 150                            | 2              | 61                  | 16             |
| Transport/binding protein                              | 10           | 369                            | 28             | 42                  | 40             |
|                                                        |              |                                |                |                     |                |
| <b>Total</b>                                           | <b>65</b>    | <b>2248</b>                    | <b>134</b>     | <b>241</b>          | <b>237</b>     |
